# Supplementary material
Source: PubMed Central journal article supplement (PMC9133030)

**Supplemental Figure 1. Flowchart.** This diagram shows the flow of participants through study procedures. *h*, hours; *C*, Celsius; *LAR*, legally authorized representative.

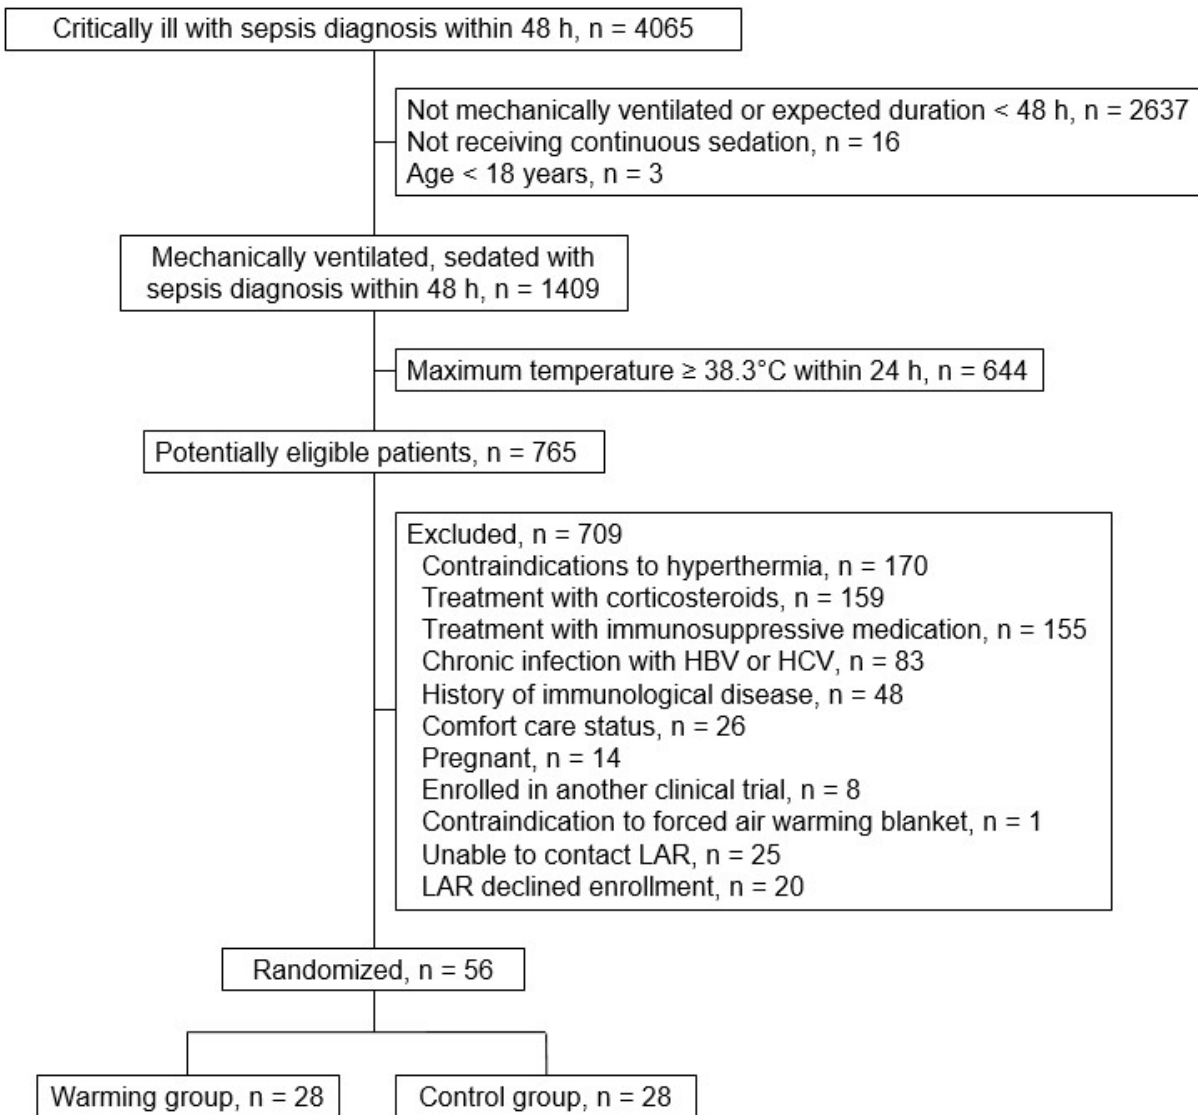

Supplement: NIHMS1770858-supplement-Supplemental_Figure_1.pdf [file NIHMS1770858-supplement-Supplemental_Figure_1.pdf]
