# Supplementary material
Source: PubMed Central journal article supplement (PMC9133030)

**Supplemental Figure 2. Physiologic effects of induced hyperthermia in afebrile sepsis patients.** These graphs show the relationship between group assignment, vasopressor dose, and vital signs throughout the entire period of warming. Both the induced hyperthermia (square) and control (circle) groups are summarized on these graphs. No substantial differences between groups were observed. **A.** Norepinephrine-equivalent doses. We converted all hourly vasopressor doses to norepinephrine-equivalent doses (42). **B.** Heart rate. **C.** Mean arterial blood pressure.

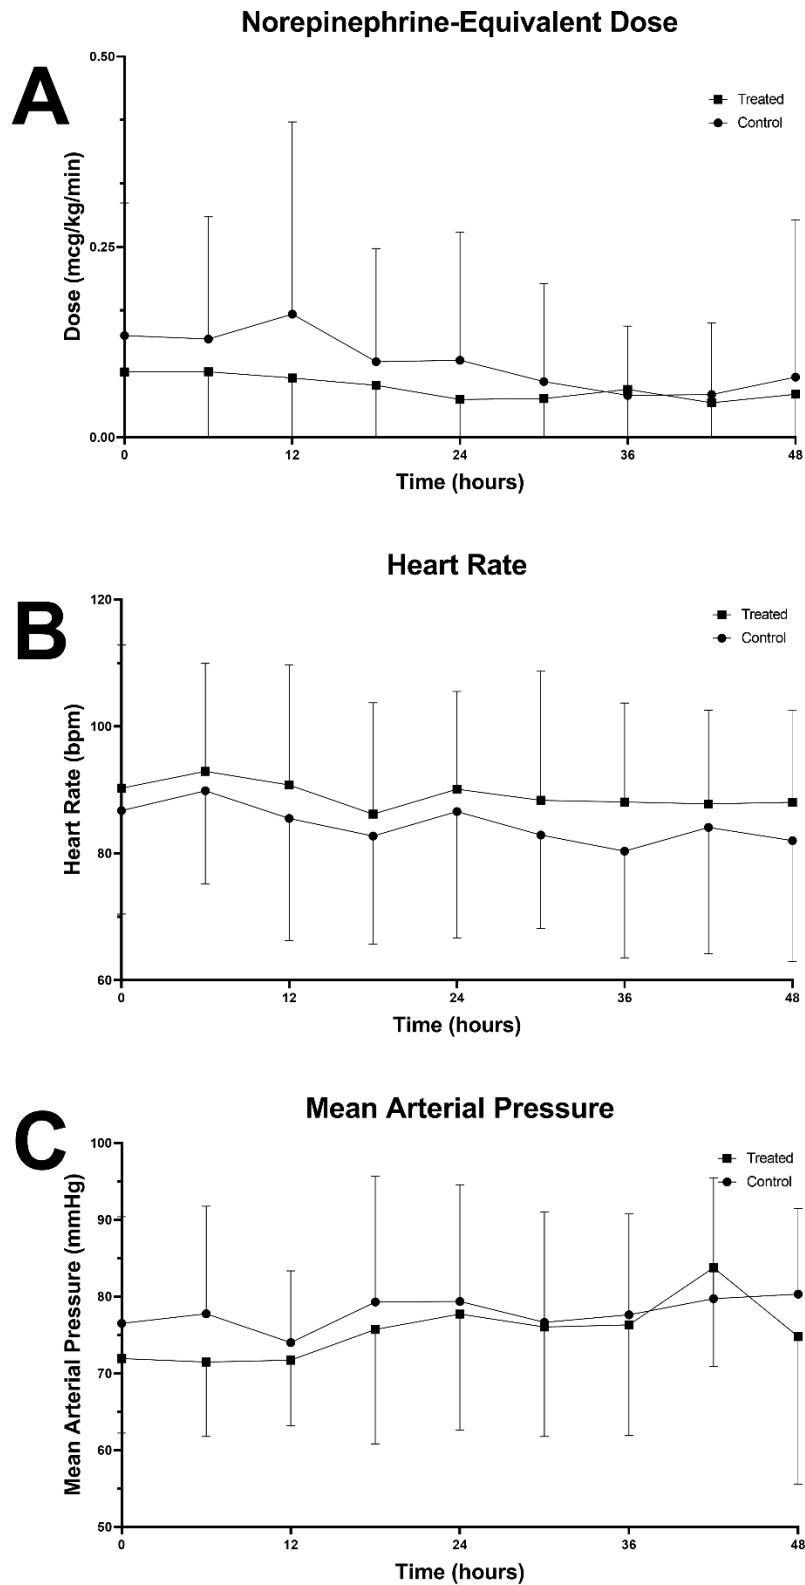

Supplement: NIHMS1770858-supplement-Supplemental_Figure_2.pdf [file NIHMS1770858-supplement-Supplemental_Figure_2.pdf]
